# Supplementary material
Source: publisher figshare collection journal article supplement (https://diabetesjournals.figshare.com/articles/dataset/_/13177115)
Supplement: Supplementary file 1 [file 1]

Supplementary Table S1. Primer sequence

| <b>Primer sequence</b>                                   |         |                                                       |
|----------------------------------------------------------|---------|-------------------------------------------------------|
| β-actin(mouse)                                           | Forward | GCTTCTAGGCGGACTGTTAC                                  |
|                                                          | Reverse | CCATGCCAATGTTGTCTCTT                                  |
| β-actin(human)                                           | Forward | CATGTACGTTGCTATCCAGGC                                 |
|                                                          | Reverse | CTCCTTAATGTCACGACGAT                                  |
| TRPC1                                                    | Forward | ATGCTGTTGGCTGTGAATGC                                  |
|                                                          | Reverse | AGACGAAACCTGGAATGTCTGA                                |
| circRNA_010383                                           | Forward | CTCCTGGAGATAGCAGGAAAAC                                |
|                                                          | Reverse | TCAGGGCTTCCACAGTCATC                                  |
| Linear_010383                                            | Forward | TTCCTGTCCATTCCGATCACC                                 |
|                                                          | Reverse | GGTCAGTCGCTTATCCTGCT                                  |
| hsa_circ_0130687<br>(human homolog of<br>circRNA_010383) | Forward | CTGGCAGAAGGAGATCATGT                                  |
|                                                          | Reverse | TGGCATGTCTACCAGAGAAT                                  |
| Akap7                                                    | Forward | CACCTCGAACCCAACTCCAG                                  |
|                                                          | Reverse | TAGTTTCCTCCGGTCTGGC                                   |
| circRNA_013935                                           | Forward | CTTTGGGAAAAATGAAGGTGG                                 |
|                                                          | Reverse | AATTAAGGTCCACGGTTCCT                                  |
| circRNA_000551                                           | Forward | GAGACCCAAGTCCTTAGGAG                                  |
|                                                          | Reverse | ACTGGGGTCTTCATAGAAGC                                  |
| circRNA_002722                                           | Forward | TCTCCCCATTCACAAGAGCA                                  |
|                                                          | Reverse | TCCAGCCAGTCTCGGAATTT                                  |
| circRNA_009326                                           | Forward | TCCCGAGCTCCAGATAAACG                                  |
|                                                          | Reverse | AGCCATTGCTTACTGCAGCC                                  |
| circRNA_010009                                           | Forward | GACCAATTTCTTCAACACCG                                  |
|                                                          | Reverse | CGAGAACCTTCCAGCAAACCT                                 |
| circRNA_010964                                           | Forward | AAACCGTTAAGAGCCCGTGG                                  |
|                                                          | Reverse | GTGCCGGTATTTAGCCTTAG                                  |
| circRNA_000903                                           | Forward | AAGCGAGAGCCATATGAAGG                                  |
|                                                          | Reverse | CATGTTTCACATTCGTGAGC                                  |
| circRNA_010383 vector<br>(pLCDH-ciR)                     | Forward | CGGAATTCTGAAATATGCTATCTTACA<br>GGAAACTAGATTCCGGTACGTG |
|                                                          | Reverse | CGGGATCCTCAAGAAAAAATATATTCA<br>CCTGCTATCTCCAGGAGTGCGC |
| Linear-010383 vector<br>(CD513b-1)                       | Forward | CGGAATTCGAAACTAGATTCCGGTACGT                          |
|                                                          | Reverse | CGGGATCCCTGCTATCTCCAGGAGTGCGC                         |

Supplementary Table S2. siRNA and probe sequences

| <b>siRNA Targets</b>                                 |                           |
|------------------------------------------------------|---------------------------|
| <b>circRNA_010383 siRNA1#</b>                        | GGAGATAGCAGGAAAATA        |
| <b>circRNA_010383 siRNA2#</b>                        | GATAGCAGGAAAATAAGAT       |
| <b>TRPC1 siRNA</b>                                   |                           |
| <b>sense</b>                                         | CGACAAGGGUGACUAUUAUTT     |
| <b>antisense</b>                                     | AUAAUAGUCACCCUUGUCGTT     |
| <b>Probes for Fish</b>                               |                           |
| <b>miR-135a</b>                                      | TCACATAGGAATAAAAAGCCATA   |
| <b>circRNA_010383</b>                                | GAATCTAGTTTTCTGCTATCTCC   |
| hsa_circ_0130687(human<br>homolog of circRNA_010383) | TAATTCCTCCTGCTATCTCCAAAAG |
| <b>Probes for RNA pull down</b>                      |                           |
| circRNA_010383                                       | TCTAGTTTTCTGCTATCTC       |
| Scramble negative control                            | CTATCGACCTTTACTTCGTT      |
