# Supplementary material
Source: publisher figshare collection journal article supplement (https://diabetesjournals.figshare.com/articles/dataset/_/13177115)

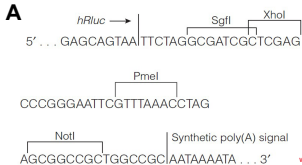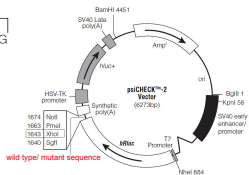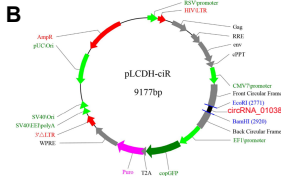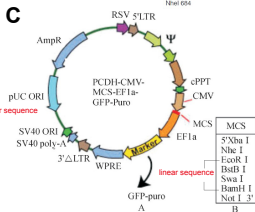

Supplementary figure S1

Supplement: Supplementary file 3 [file 1]
